# Supplementary material for: Photoimmunotherapy retains its anti-tumor efficacy with increasing stromal content in heterotypic pancreatic cancer spheroids
Source: PubMed Central journal article supplement — Mol Pharm. Author manuscript; Available in PMC 2023 Aug 22. (PMC10443673; doi:10.1021/acs.molpharmaceut.2c00260), 2022-05-18
Supplement: NIHMS1921058-supplement-supplementary_info.pdf [file NIHMS1921058-supplement-supplementary_info.pdf]

# Photoimmunotherapy retains its anti-tumor efficacy with increasing stromal content in heterotypic pancreatic cancer spheroids

*Mohammad A. Saad<sup>1</sup>, Wonho Zhung<sup>2</sup>, Margaret Elizabeth Stanley<sup>3</sup>, Sydney Formica<sup>4</sup>, Stacey Grimaldo-Garcia<sup>5</sup>, Girgis Obaid<sup>1,6</sup> and Tayyaba Hasan<sup>1,7\*</sup>*

<sup>1</sup> Wellman Center for Photomedicine, Massachusetts General Hospital and Harvard Medical School, Boston, MA 02114, USA

<sup>2</sup> Department of Chemistry, KAIST, Daejeon, 34141, Republic of Korea

<sup>3</sup> Joint Department of Biomedical Engineering, University of North Carolina at Chapel Hill, Chapel Hill, NC, North Carolina State University, Raleigh, NC 27695, USA

<sup>4</sup> Bouvè college of Health Science, Northeastern University, Boston, MA 02115, USA

<sup>5</sup> Middlebury College, Middlebury, VT 05753, USA

<sup>6</sup> Current address: Department of Bioengineering, University of Texas at Dallas, Richardson 75080, Texas, USA

<sup>7</sup> Division of Health Sciences and Technology, Harvard University and Massachusetts Institute of Technology, Cambridge, MA 02139, USA

\* Correspondence: [thasan@mgh.harvard.edu](mailto:thasan@mgh.harvard.edu)

Tayyaba Hasan Ph.D.

Professor of Dermatology

Professor of Health Sciences and Technology (Harvard-MIT)

Wellman Center for Photomedicine, Harvard Medical School

Massachusetts General Hospital

40 Blossom Street, (Bartlett 314), Boston, MA 02114

Phone: 617-726-6996

FAX: 617-724-1345

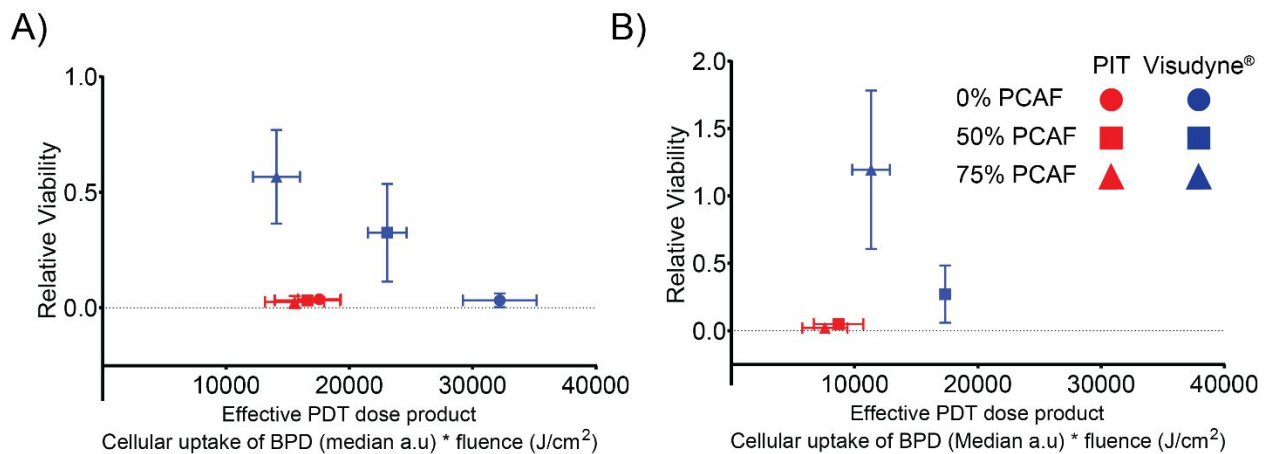

**Supplementary figure S1:** Relative viability of individual MIA PaCa-2 (A) and PCAF (B) populations in spheroids (formed with 0% (circles), 50% (squares) and 75% (triangles) PCAFs treated with either PIT (red shapes) or Visudyne®-PDT (blue shapes). Relative viabilities are plotted as a function of effective PDT dose (Cellular uptake of BPD (median a.u.) \* fluence (J/cm<sup>2</sup>)). Although Visudyne®-PDT and PIT were performed with fluence of 5 J/cm<sup>2</sup> and 20 J/cm<sup>2</sup>, respectively, the PDT dose was significantly higher for Visudyne®-PDT. However, even with lower PDT doses, PIT was more phototoxic than Visudyne®-PDT. The PDT doses for MIA PaCa-2 cells were similar for spheroids formed with 75% PCAF, however their relative viabilities were significantly different with PIT being more phototoxic.

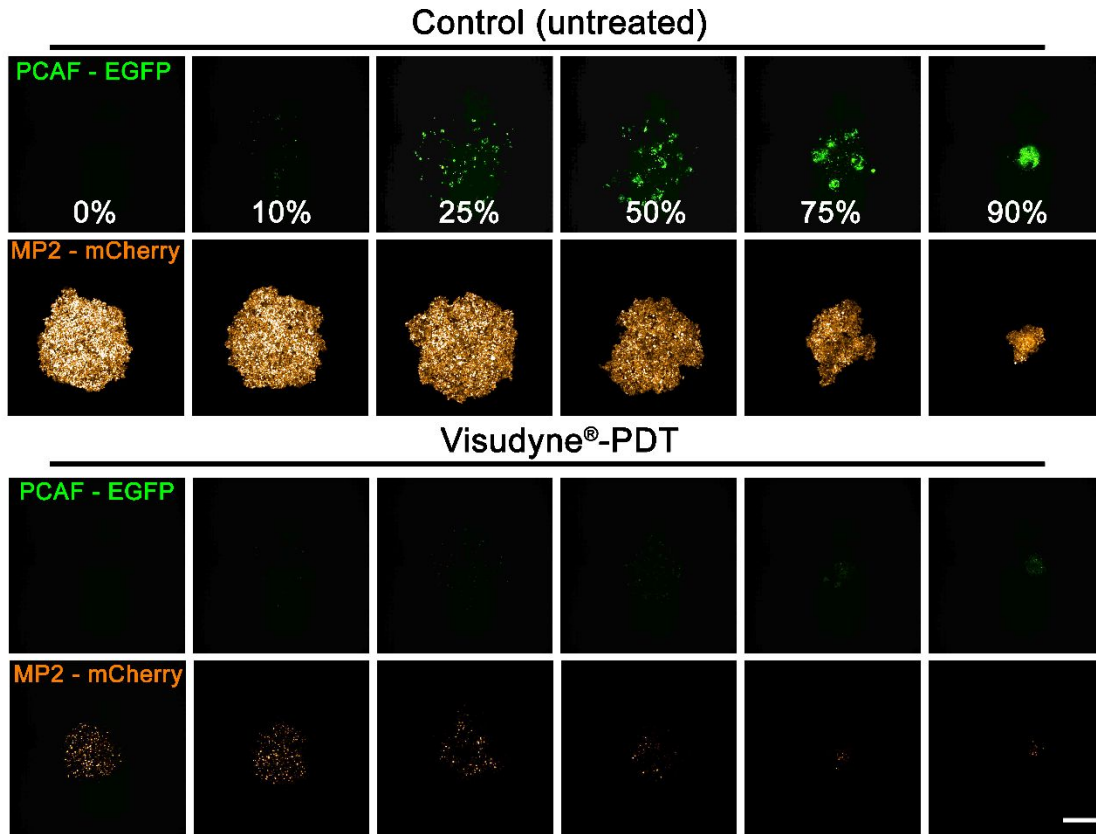

Supplementary figure S2: Response of heterotypic MIA PaCa-2-PCAF 3D cultures to Visudyne®-PDT with a 24 h drug-light interval (DLI). Maximum intensity projection (MIP) of fluorescence signals from MIA PaCa-2-PCAF spheroids with different PCAF percentage on day 3 post-PDT. PCAF percentage is mentioned in the top panel (control spheroids PCAF-EGFP panel). Scale bar corresponds to 500  $\mu\text{m}$ .

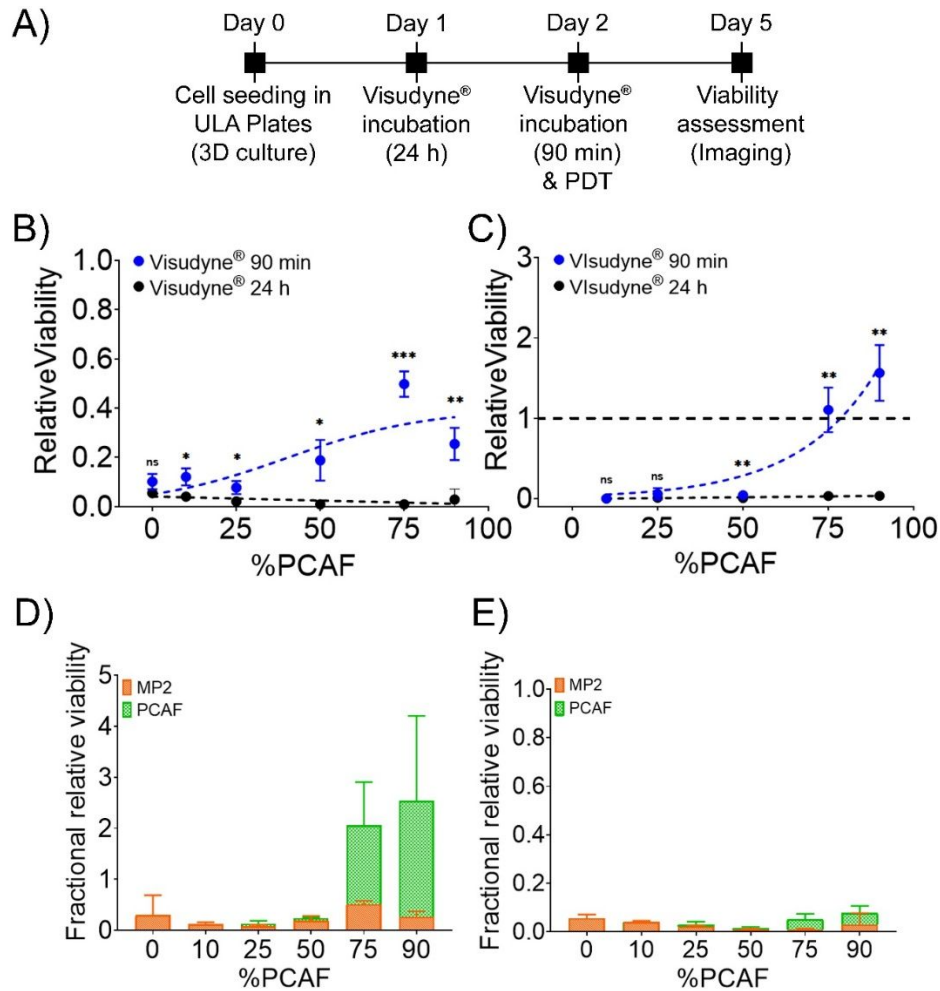

**Supplementary figure S3: Quantitation of cell viability in heterotypic MIA PaCa-2-PCAF 3D cultures in response to Visudyne®-PDT with drug-light intervals of 90 min and 24 h.** (A) Experimental schedule for Visudyne®-PDT of heterotypic MIA PaCa-2-PCAF spheroids. Cells were seeded in CellCarrier Spheroid ULA 96-well Microplates followed by incubation with Visudyne® for 24 h and 90 min, respectively. The spheroids were then irradiated with a light dose of 5 J/cm<sup>2</sup> followed by imaging for 3 days. Relative viability of individual MIA PaCa-2 (B) and PCAF (C) populations in spheroids (formed with different PCAF percentage) treated with either Visudyne® (90 min DLI) (blue circles) or Visudyne®-PDT (24 h DLI) (black circles). Data are presented as mean ± S.D (n ≥ 3), analyzed using Welch's t-test analysis. P-values < 0.05 were considered to be significant and are indicated by asterisks as follows: <sup>ns</sup>P>0.05, \*P<0.05, \*\*P<0.01, \*\*\*P<0.001 and \*\*\*\*P<0.0001. (C) Fractional relative viability of MIA PaCa-2 and PCAFs in spheroids treated with Visudyne®-PDT with a 90 min DLI (D) and Visudyne®-PDT with a 24 h DLI (E)

calculated as described in the methods. MIA PaCa-2 are represented as orange bars and PCAFs are represented as green bars. Data are presented as mean  $\pm$  S.D (n  $\geq$ 3).

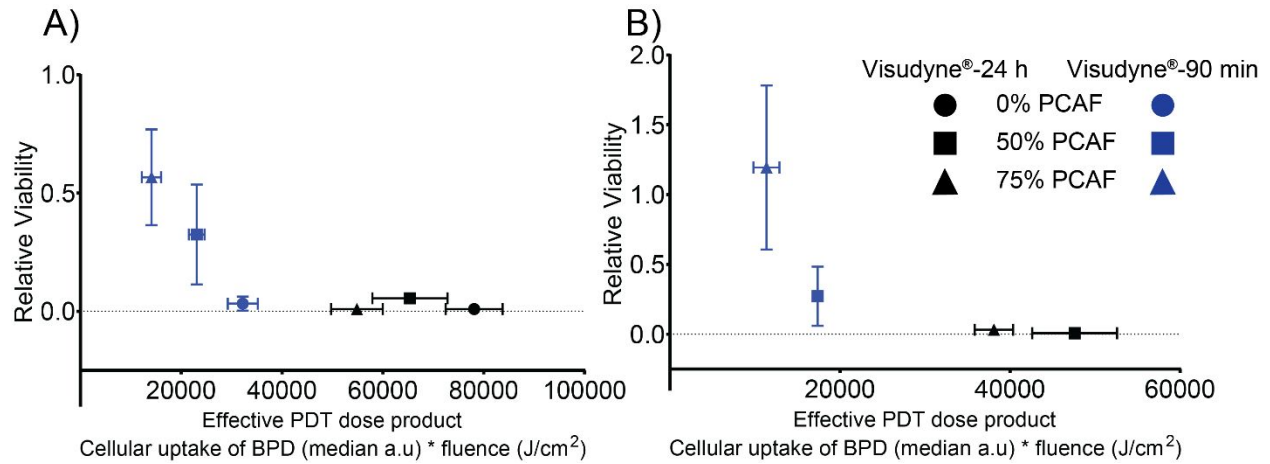

**Supplementary figure S4:** Relative viability of individual MIA PaCa-2 (A) and PCAF (B) populations in spheroids (formed with 0% (circles), 50% (squares) and 75% (triangles) PCAFs treated with Visudyne®-PDT after a 24 h (black shapes) or 90 min (blue shapes) drug light interval. Relative viabilities are plotted as a function of effective PDT dose (Cellular uptake of BPD (median a.u) \* fluence (J/cm<sup>2</sup>)). Although PDT was performed with fluence of 5 J/cm<sup>2</sup> the effective PDT dose product was significantly higher for Visudyne®-PDT performed after a 24 h incubation due to the significantly higher cellular BPD uptake. Therefore, irrespective of the spheroid composition, Visudyne®-PDT performed after a 24 h drug light interval was significantly more phototoxic than Visudyne®-PDT performed after a 90 min incubation.

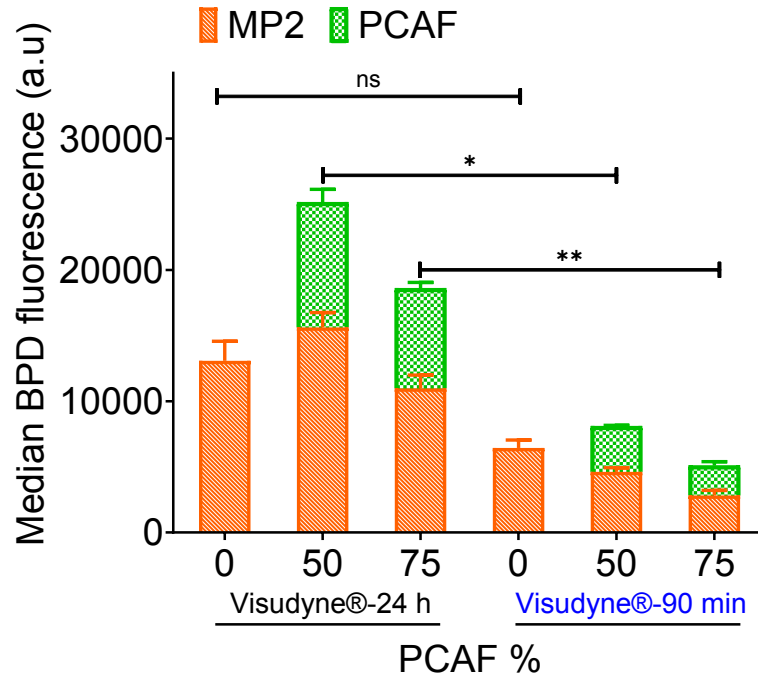

**Supplementary figure S5: Photosensitizer uptake in heterotypic 3D spheroids.** Median BPD fluorescence of spheroids treated with Visudyne® for either 90 min or 24 h. Green bars represent PCAFs while orange bars represent MIA PaCa-2 cells. BPD uptake in the spheroids increased with increasing incubation time. Data are presented as mean  $\pm$  S.D (n  $\geq$  3), analyzed using Welch's t-test analysis. P-values < 0.05 were considered to be significant and are indicated by asterisks as follows: <sup>ns</sup>P>0.05, \*P<0.05, \*\*P<0.01, \*\*\*P<0.001 and \*\*\*\*P<0.0001.

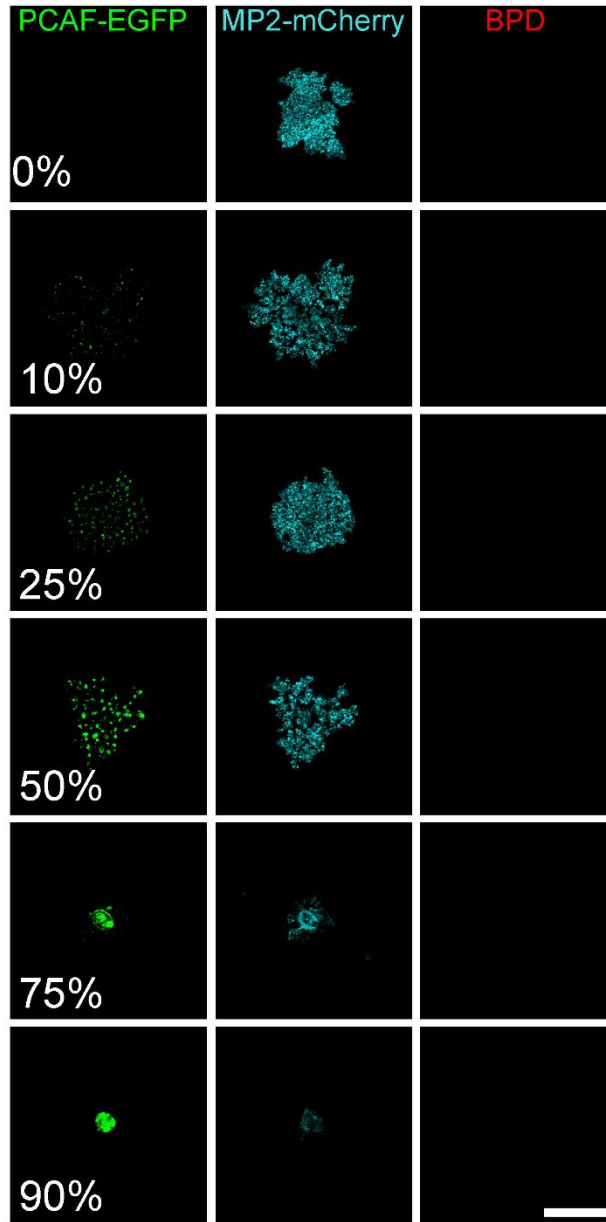

Supplementary figure S6: Representative confocal fluorescence images of the central optical section of untreated 3D spheroids. MIA PaCa-2 cells and PCAFs are pseudo-colored as cyan and green. No signal was observed in the BPD channel suggesting minimal contribution of EGFP and mCherry fluorescence in the BPD channel (scale bar = 500  $\mu\text{m}$ ).

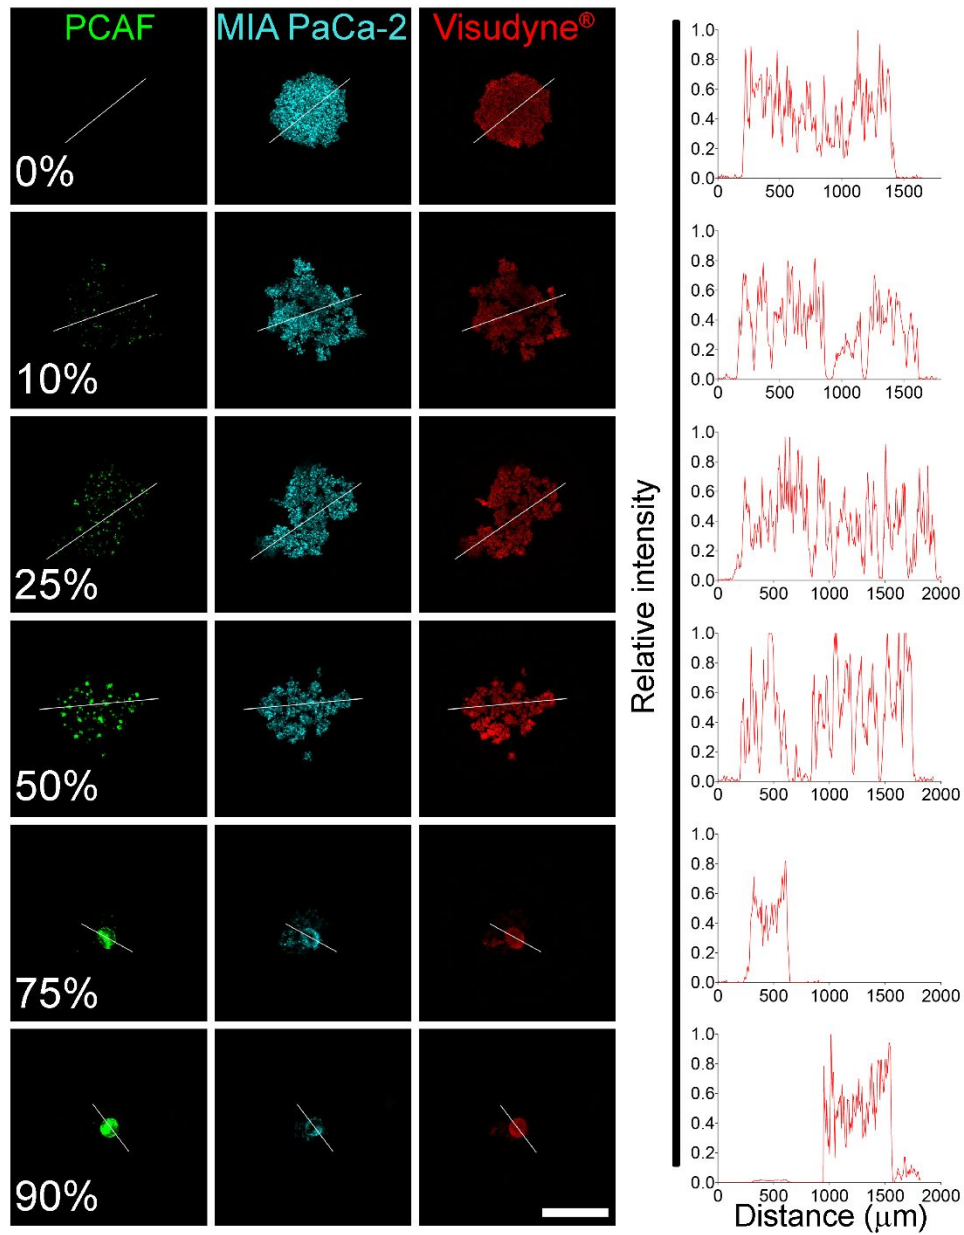

**Supplementary figure S7: Photosensitizer distribution in heterotypic 3D spheroids treated with Visudyne® for 24 h.**

Representative confocal images of the central optical section of the 3D spheroids. MIA PaCa-2 cells and PCAFs are pseudo-colored as cyan and green. BPD is shown in pseudo-colored as red. Profile plots were generated using image J to monitor BPD distribution across the central plane. As suggested by the profile-plots, the distribution of BPD was homogeneous across the central section irrespective of the spheroid composition (scale bar = 500  $\mu\text{m}$ ).



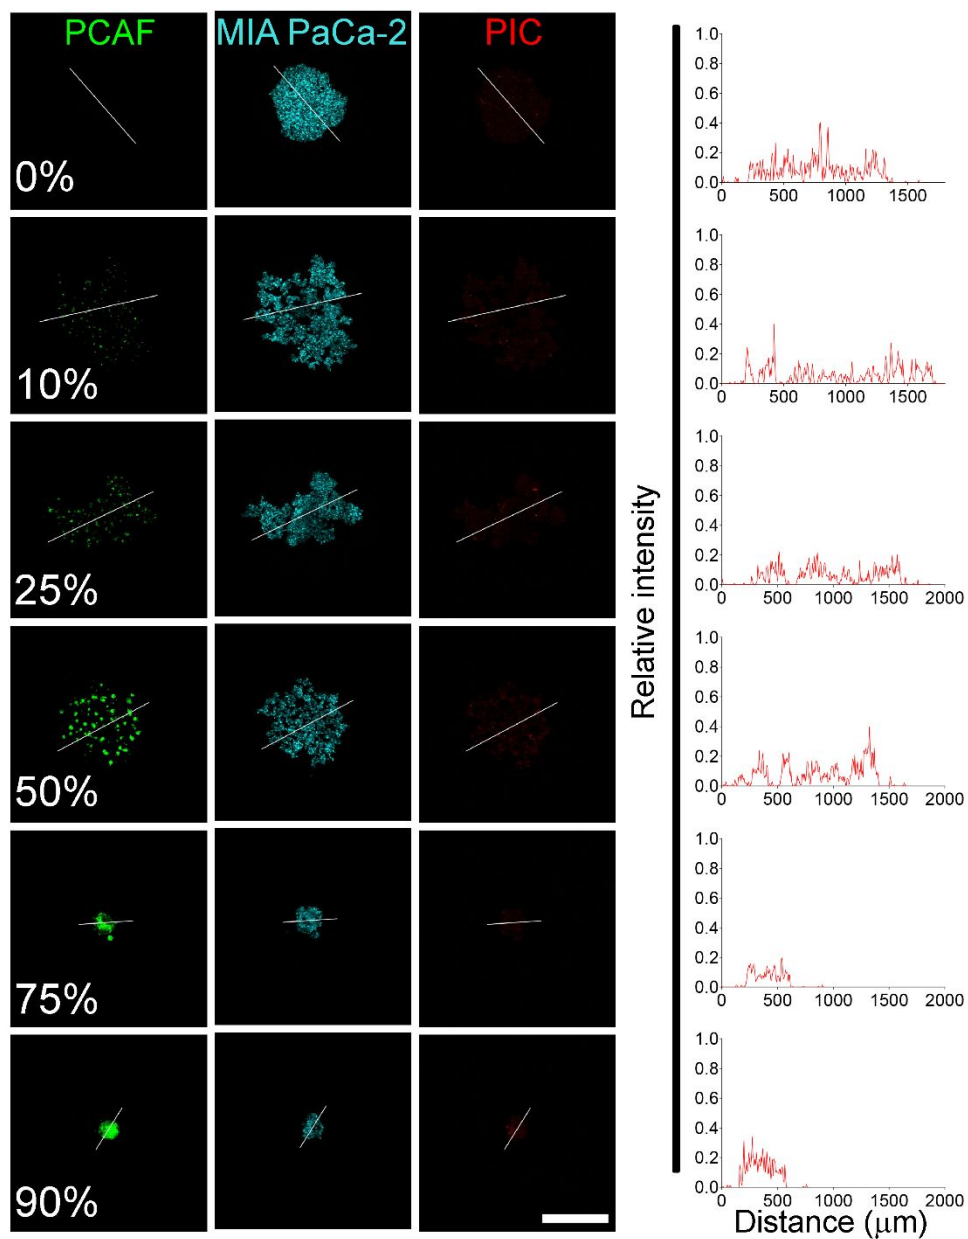

**Supplementary figure S8: Photosensitizer distribution in heterotypic 3D spheroids treated with PIC for 90 min.**

Representative confocal images of the central optical section of the 3D spheroids. MIA PaCa-2 cells and PCAFs are pseudo-colored as cyan and green. BPD is pseudo-colored as red. Profile plots were generated using image J to monitor

BPD distribution across the central plane. PICs are taken up by receptor-mediated endocytosis and attains maximum fluorescence intensity in 8 – 24 h. A 90 min incubation period was thus too low to achieve efficient PIC uptake, accounting for the low BPD signal. However, profile-plots suggest a homogeneous distribution of BPD (PIC) across the central section irrespective of the spheroid composition (scale bar = 500  $\mu\text{m}$ ).
